# Supplementary material for: Potentially suitable areas for Ricania speculum (Hemiptera: Ricaniidae) in China under climate change
Source: Frontiers journal article supplement (doi:10.3389/fevo.2025.1549532), 2025-03-27
Supplement: Table_1.xlsx [file Table_1.xlsx]

## Sheet: Table S1
species	x	y
Ricania speculum	116.326	40.1333
Ricania speculum	119.398	30.4357
Ricania speculum	118.57	29.4571
Ricania speculum	101.281	21.9091
Ricania speculum	120.147	30.2131
Ricania speculum	116.521	39.8521
Ricania speculum	113.757	26.2072
Ricania speculum	119.998	30.3517
Ricania speculum	114.599	30.612
Ricania speculum	121.442	38.9292
Ricania speculum	119.46	36.9649
Ricania speculum	118.994	33.6507
Ricania speculum	116.176	39.9839
Ricania speculum	121.396	28.3762
Ricania speculum	119.569	32.4233
Ricania speculum	115.08	28.8927
Ricania speculum	119.73	30.2563
Ricania speculum	117.821	29.2339
Ricania speculum	115.83	28.7706
Ricania speculum	111.635	36.1305
Ricania speculum	108.583	27.8553
Ricania speculum	113.56	22.3181
Ricania speculum	117.043	36.6006
Ricania speculum	122.431	37.3375
Ricania speculum	116.672	40.4101
Ricania speculum	119.03	31.5938
Ricania speculum	113.926	27.1937
Ricania speculum	120.654	28.0192
Ricania speculum	117.5	27.2997
Ricania speculum	112.134	25.4582
Ricania speculum	114.393	22.638
Ricania speculum	121.528	31.2976
Ricania speculum	120.108	29.3601
Ricania speculum	110.501	24.8029
Ricania speculum	117.876	27.8711
Ricania speculum	120.446	36.0924
Ricania speculum	119.83	30.604
Ricania speculum	114.504	38.1108
Ricania speculum	118.792	32.0966
Ricania speculum	121.438	31.0315
Ricania speculum	118.466	31.3274
Ricania speculum	112.76	28.1677
Ricania speculum	119.613	31.2544
Ricania speculum	105.432	28.8738
Ricania speculum	104.691	38.0733
Ricania speculum	116.61	25.11
Ricania speculum	117	25.17
Ricania speculum	118.47	26.99
Ricania speculum	118.07	27.41
Ricania speculum	117.64	27.73
Ricania speculum	117.38	26.51
Ricania speculum	104.86	32.96
Ricania speculum	113.2	22.84
Ricania speculum	114.22	23.26
Ricania speculum	113.34	24.19
Ricania speculum	114.04	22.54
Ricania speculum	106.52	23.91
Ricania speculum	110.05	25.26
Ricania speculum	110.04	25.84
Ricania speculum	107.11	24.53
Ricania speculum	108.21	23.22
Ricania speculum	109.62	22.15
Ricania speculum	106.34	26.37
Ricania speculum	105.96	27.41
Ricania speculum	108.4	26.03
Ricania speculum	108.34	26.29
Ricania speculum	108.07	25.39
Ricania speculum	107.95	25.84
Ricania speculum	105.82	24.96
Ricania speculum	104.94	24.98
Ricania speculum	108.1	28.31
Ricania speculum	108.8	27.71
Ricania speculum	108.16	27.49
Ricania speculum	108.16	27.83
Ricania speculum	109.11	27.55
Ricania speculum	108.63	28.09
Ricania speculum	108.98	27.32
Ricania speculum	107.24	28.15
Ricania speculum	110.73	33.88
Ricania speculum	113.54	34.77
Ricania speculum	115.44	30.92
Ricania speculum	112.11	31.14
Ricania speculum	110.46	31.57
Ricania speculum	113.25	31.88
Ricania speculum	114.6	29.58
Ricania speculum	111.35	30.34
Ricania speculum	110.84	30.48
Ricania speculum	110.22	27.89
Ricania speculum	113.52	29.52
Ricania speculum	110.4	29.12
Ricania speculum	114.96	29.22
Ricania speculum	108.33	32.95
Ricania speculum	108.41	32.46
Ricania speculum	110.05	34.51
Ricania speculum	108.04	34.27
Ricania speculum	121.19	31.02
Ricania speculum	103.4	29.49
Ricania speculum	98.8	24.48
Ricania speculum	97.79	24.06
Ricania speculum	97.65	24.61
Ricania speculum	99.16	27.46
Ricania speculum	103.68	23.1
Ricania speculum	98.52	27.94
Ricania speculum	100.83	24.45
Ricania speculum	100.58	23.33
Ricania speculum	100.97	22.02
Ricania speculum	100.31	21.96
Ricania speculum	100.47	22.38
Ricania speculum	101.46	21.77
Ricania speculum	119.35	30.18
Ricania speculum	108.3	30.82
